# Supplementary material
Source: PubMed Central journal article supplement (PMC3164389)
Supplement: NIHMS317988-supplement-1_si_001.pdf [file NIHMS317988-supplement-1_si_001.pdf]

## ***Supporting Information***

### ***for the manuscript entitled:***

Exploiting topological constraints to reveal buried sequence motifs in the membrane-bound N-linked oligosaccharyl transferases

*Marcie B. Jaffee and Barbara Imperiali*

Department of Biology and Department of Chemistry, Massachusetts Institute of Technology,

77 Massachusetts Avenue, Cambridge, MA, 02139, USA.

|           |           |                                                                                                                                                    |
|-----------|-----------|----------------------------------------------------------------------------------------------------------------------------------------------------|
| Page S1   | Table S1  | Gene identifiers and source organisms for all sequences used in alignments.                                                                        |
| Page S2-3 | Figure S2 | Code (Python) for the programs TMH.py and Extract.py, which together parse and organize the sequences according to topology prediction data.       |
| Page S4   | Figure S3 | Full alignments of STT3 motifs.                                                                                                                    |
| Page S5   | Figure S4 | Additional activity assays and extended time points for assays performed on of PglB mutants.                                                       |
| Page S6   | Figure S5 | Western blot analysis of limited proteolysis fractions from PglB mutants.                                                                          |
| Page S7   | Figure S6 | Quantitative western blot analysis: example of blot and standard curve derived from it. Estimated relative concentrations of mutants and WT.       |
| Page S8   | Table S7  | Tables showing rates measured directly from activity assays at varied substrate concentrations and after correction for concentration differences. |

**S1:** Identities of STT3 sequences used in all bioinformatic analysis.

| Name                            | Description                                                                                                               |
|---------------------------------|---------------------------------------------------------------------------------------------------------------------------|
| gi 1322489 emb CAA96722.1       | STT3 [ <i>Saccharomyces cerevisiae</i> ]                                                                                  |
| gi 11497941 ref NP_069165.1     | transmembrane oligosaccharyl transferase, putative [ <i>Archaeoglobus fulgidus</i> DSM 4304]                              |
| gi 15669720 ref NP_248533.1     | putative transmembrane oligosaccharyl transferase [ <i>Methanocaldococcus jannaschii</i> DSM 2661]                        |
| gi 87045854 gb ABD17750.1       | STT3 [ <i>Methanococcus voltae</i> PS]                                                                                    |
| gi 134045200 ref YP_001096686.1 | oligosaccharyl transferase, STT3 subunit [ <i>Methanococcus maripaludis</i> C5]                                           |
| gi 150012189 gb ABR54641.1      | Oligosaccharyl transferase STT3 subunit [ <i>Methanococcus vannielii</i> SB]                                              |
| gi 261402368 ref YP_003246592.1 | Oligosaccharyl transferase STT3 subunit [ <i>Methanocaldococcus vulcanius</i> M7]                                         |
| gi 281485606 ref NP_001164010.1 | STT3, subunit of the oligosaccharyltransferase complex, homolog B [ <i>Rattus norvegicus</i> ]                            |
| gi 148226196 ref NP_001083986.1 | STT3, subunit of the oligosaccharyltransferase complex, homolog A [ <i>Xenopus laevis</i> ]                               |
| gi 211965698 gb EEB00894.1      | oligosaccharyl transferase STT3, putative [ <i>Toxoplasma gondii</i> ME49]                                                |
| gi 121904152 gb EAY09105.1      | Oligosaccharyl transferase STT3 subunit family protein [ <i>Trichomonas vaginalis</i> G3]                                 |
| gi 86153042 ref ZP_01071247.1   | Oligosaccharyl transferase STT3 subunit superfamily [ <i>Campylobacter jejuni</i> subsp. <i>jejuni</i> HB93-13]           |
| gi 308159114 gb EFO61662.1      | Oligosaccharyl transferase STT3 subunit [ <i>Giardia lamblia</i> P15]                                                     |
| gi 127799903 gb AAH48348.2      | STT3, subunit of the oligosaccharyltransferase complex, homolog A ( <i>S. cerevisiae</i> ) [ <i>Homo sapiens</i> ]        |
| gi 55154464 gb AAH85313.1       | STT3, subunit of the oligosaccharyltransferase complex, homolog A ( <i>S. cerevisiae</i> ) [ <i>Mus musculus</i> ]        |
| gi 30851502 gb AAH52433.1       | STT3, subunit of the oligosaccharyltransferase complex, homolog B ( <i>S. cerevisiae</i> ) [ <i>Mus musculus</i> ]        |
| gi 238881972 gb EEQ45610.1      | oligosaccharyl transferase STT3 subunit [ <i>Candida albicans</i> WO-1]                                                   |
| gi 18976528 ref NP_577885.1     | oligosaccharyl transferase stt3 subunit related protein [ <i>Pyrococcus furiosus</i> DSM 3638]                            |
| gi 18419993 ref NP_568380.1     | STT3A (STAUROSPORIN AND TEMPERATURE SENSITIVE 3-LIKE A); oligosaccharyl transferase [ <i>Arabidopsis thaliana</i> ]       |
| gi 529357 gb AAC24442.1         | Hypothetical protein T12A.2 [ <i>Caenorhabditis elegans</i> ]                                                             |
| gi 253510784 gb EES89443.1      | oligosaccharyl transferase pgIB [ <i>Helicobacter canadensis</i> MIT 98-5491]                                             |
| gi 17738187 ref NP_524494.1     | oligosaccharyl transferase 3 [ <i>Drosophila melanogaster</i> ]                                                           |
| gi 34556499 ref NP_906314.1     | oligosaccharyltransferase [ <i>Wolinella succinogenes</i> DSM 1740]                                                       |
| gi 307721432 ref YP_003892572.1 | Oligosaccharyl transferase STT3 subunit [ <i>Sulfurimonas autotrophica</i> DSM 16294]                                     |
| gi 224373660 ref YP_002608032.1 | oligosaccharyl transferase, STT3 subunit [ <i>Nautilia profundicola</i> AmH]                                              |
| gi 219868319 gb ACL48654.1      | Oligosaccharyl transferase STT3 subunit [ <i>Desulfovibrio desulfuricans</i> subsp. <i>desulfuricans</i> str. ATCC 27774] |
| gi 325066002 gb ADY74009.1      | Oligosaccharyl transferase STT3 subunit [ <i>Desulfurobacterium thermolithotrophum</i> DSM 11699]                         |
| gi 317114826 gb ADU97316.1      | Oligosaccharyl transferase STT3 subunit [ <i>Thermovibrio ammonificans</i> HB-1]                                          |

**S2:** Python code for programs developed to a) parse and b) organize and group sequence data according to predicted topological constraints.

a)

```
#Program 1: TMH.py
#extracts topology prediction data from TMHMM output
#takes in topology results and extracts the gi number and ranges in the sequences predicted to be TMhelix (or inside, or #outside, by
changing 'TMhelix' to appropriate
S
import sys

if len(sys.argv) == 1:
    print "Error: Must input a file name"; sys.exit()
else:
    fn = sys.argv[1]
    fh = open(fn)
    lines = fh.readlines()
    output = sys.argv[2]
    sys.stdout = open(output, 'a')
    seqs = []
    r = ""
    for line in lines:
        string = line
        if len(string) > 1:
            if string[2] == '_':
                m = 1
                splat = string.split()
                j = splat[0]
                j = j.split('_')
                gi = j[1]
                if splat[2] == 'outside':
                    a = splat[3]
                    a = int(a)
                    a = a - 2
                    if a < 1:
                        a = 1
                    b = splat[4]
                    b = int(b)
                    b = b + 2
                    print gi, a, b
```

---

b)

```
#Program 2: Extract.py
#first input- takes in list of fasta sequences and removes newline
#second input- file output from TMHMM program with gi and its range for a specific topological section
#output- prints the gi, the range, and the sequence corresponding to that range

import sys

if len(sys.argv) == 1:
    print "Error: Must input a file name"; sys.exit()
```

```

else:
    fn = sys.argv[1]
    seq = sys.argv[2]
fh = open(fn)
lines = fh.readlines()

output = sys.argv[3]
sys.stdout = open(output, 'a')
seqs = []
gi = ""
for line in lines:
    if line[0] == '>':
        seqs.append(gi)
        r = ""
        line = line.split('|')
        gi = line[1]
        gi = gi + '_'
    else:
        line = line.rstrip("\n")
        line = str(line)
        gi+=line

seqs = seqs[1:]
fh = open(seq)
linez = fh.readlines()
for i in linez:
    line = i.split( )
    gi = line[0]
    range1 = line[1]
    if range1 < 0:
        range1 = 1
    range2 = line[2]
    range1, range2 = int(range1), int(range2)
    range1 = range1 - 1
    for j in seqs:
        k = j.split('_')
        if gi == k[0]:
            sec = k[1]
            #range2 = len(sec)
            sec1 = sec[range1:range2]
            range1, range2 = range1 +1, range2 +1
            range1, range2 = str(range1), str(range2)
            print '>' + gi, '[' + range1 + ':' + range2 + ']'
            print sec1

```



**S3:** Full alignments for discovered regions of OTase conservation using all 28 sequences listed in Table S1. Alignment conservation calculation uses the MAAFT method of multiple sequence alignment (Liingstone, C. D., Barton, G. J. (1993) *CABIOS* 9: 745-756).

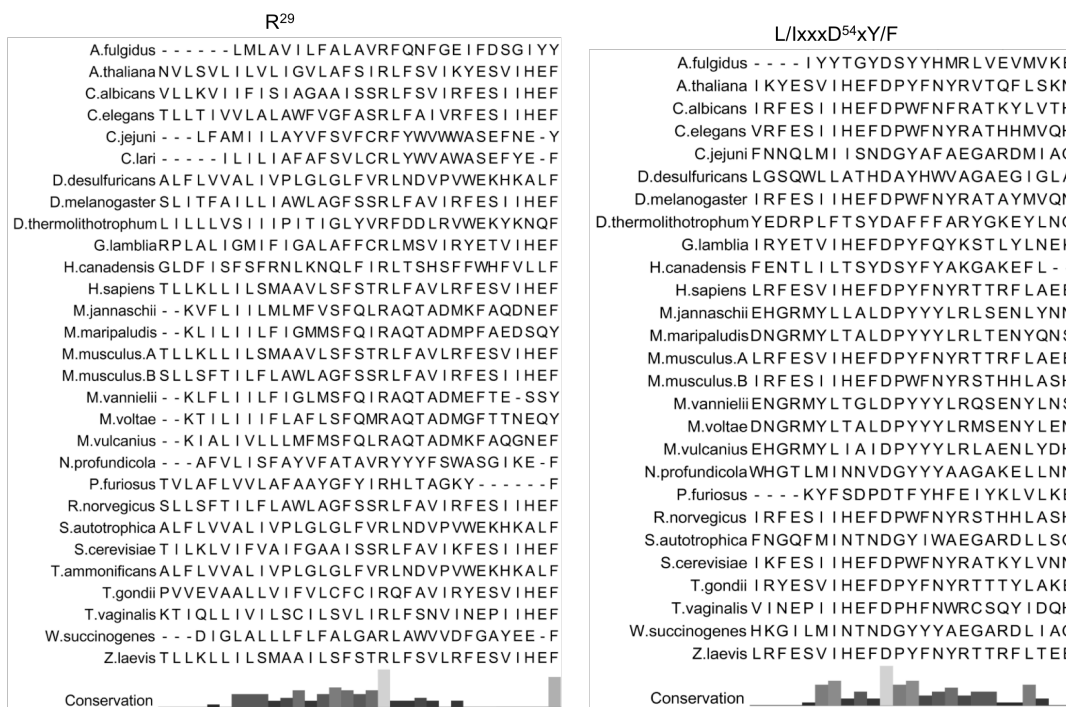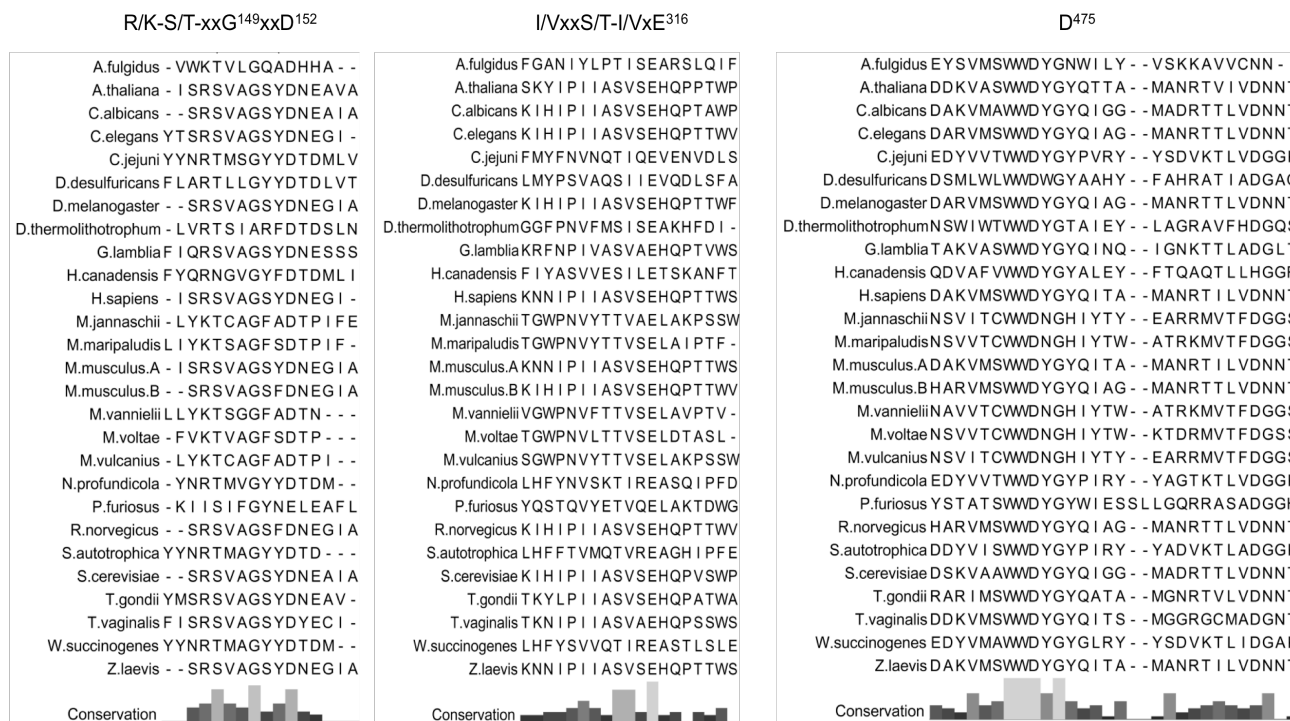

**S4:** PglB activity assays performed on PglB mutants. Shown are assay results for loop mutants with extended (overnight) time points, negative control mutants K124A and K351A (showing WT-levels of activity), and D<sup>519</sup>xxK and D<sup>553</sup>xxK mutant assays.

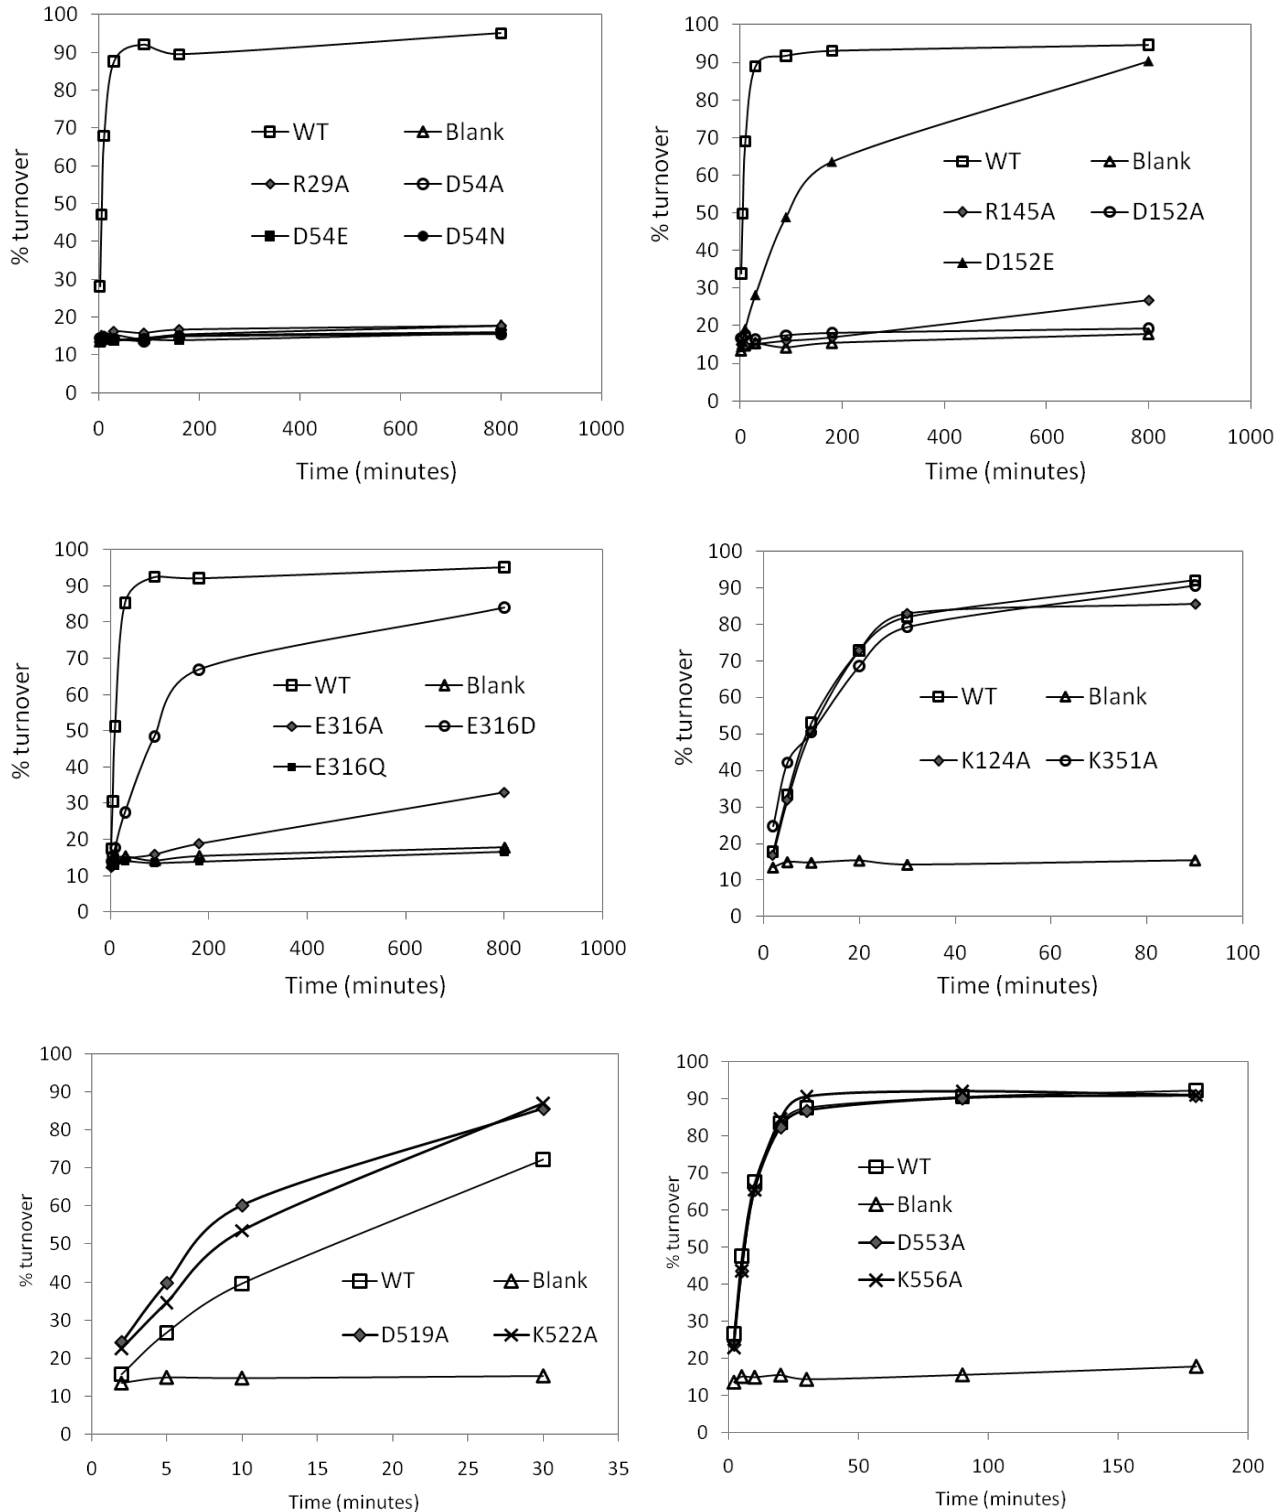

**S5: PglB mutants maintain wild-type tertiary structure.** Limited proteolysis of mutants assayed in sets, each accompanied by wild-type PglB for comparison. Anti-His western blot analysis was performed on fractions of the reaction quenched at 0, 5, 10, 30, 60, and 180 minutes. Arrows indicate the location of the full-length PglB band at the start of the reaction. **Numbers to the left of wild-type blots indicate molecular weight (kDa) of select protein standards.**

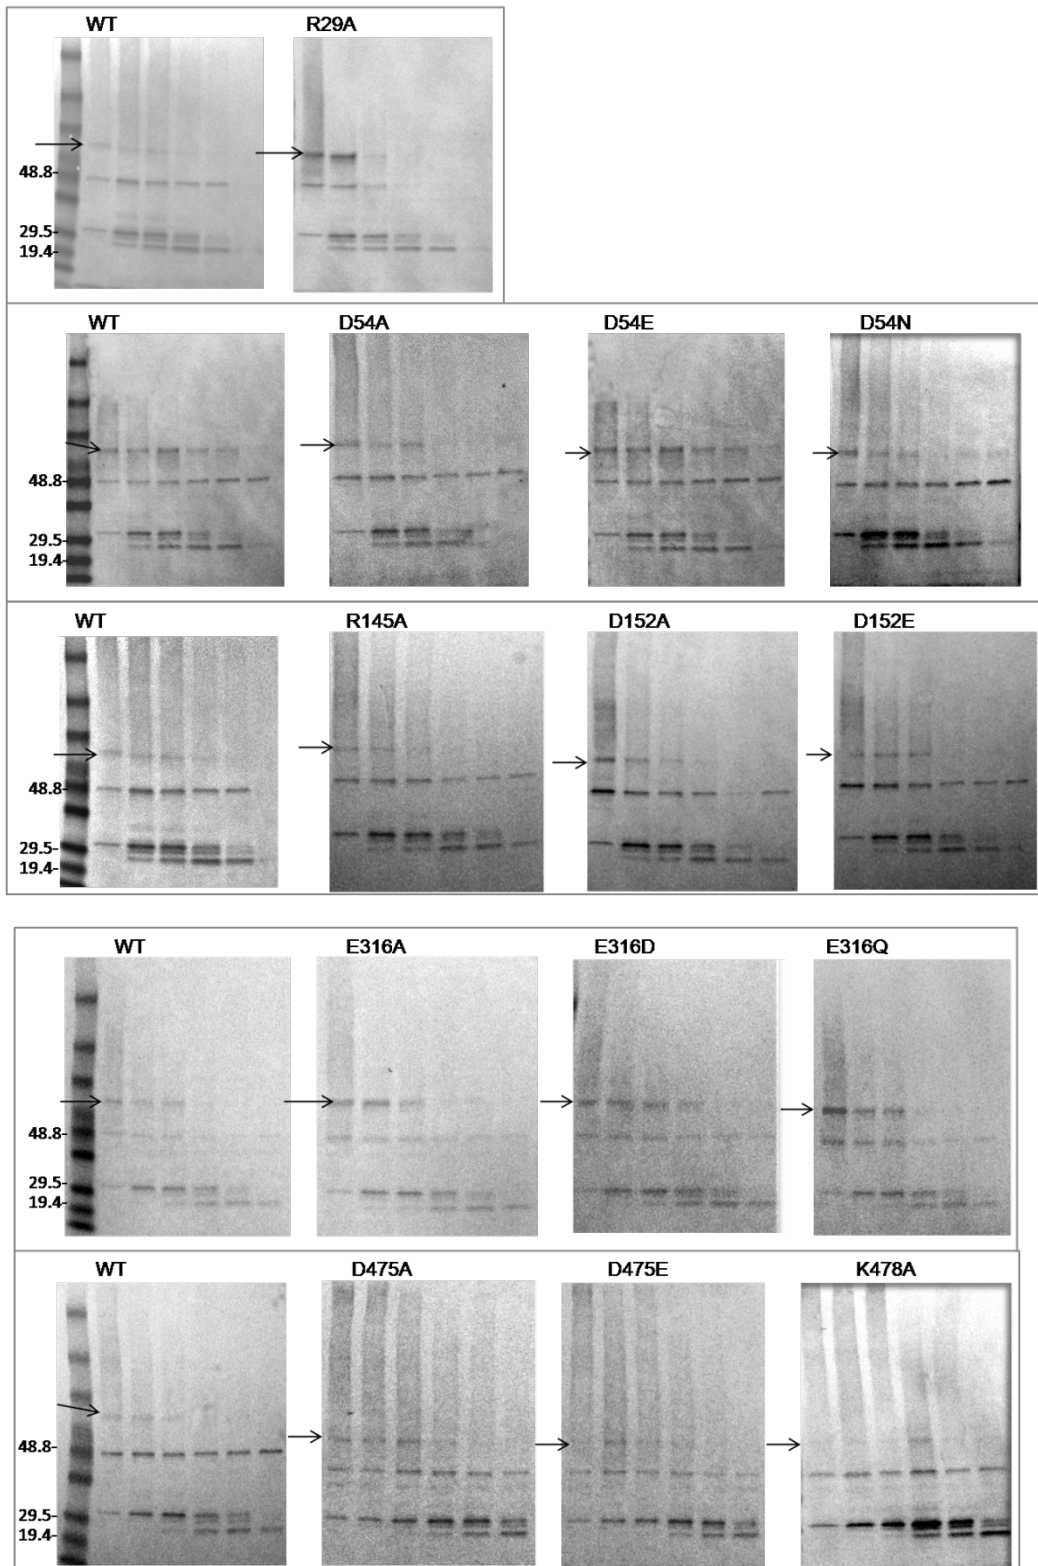



**S6:** Quantitative western blotting used to determine relative levels of mutant enzymes which showed partial activity. Average fold differences in activity were used to correct for variations when measuring relative rate data at varying substrate concentrations. As indicated in the legend below the blot, lanes 1-8 show mutant CEFs and lanes 9-14 show various levels of pure, quantified PglB. The intensities of the varied amounts of pure protein are used to derive a standard curve (upper right). This curve was used to estimate the quantities of protein in the CEFs shown in the blot. Fold differences in enzyme levels are shown in the bar graph on the bottom right. Error bars indicate the standard error from averages of multiple western blots.

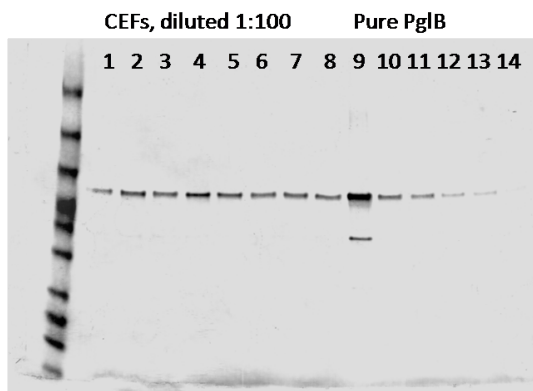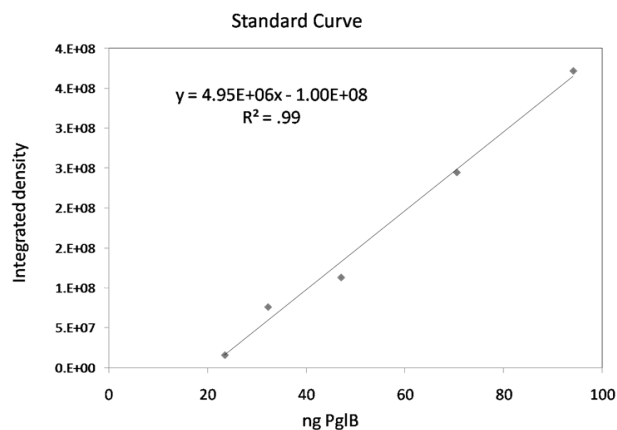

- |          |             |
|----------|-------------|
| 1. WT    | 9. 470 (ng) |
| 2. R145A | 10. 94.1    |
| 3. D152E | 11. 70.5    |
| 4. E316A | 12. 47.05   |
| 5. E316D | 13. 32.25   |
| 6. D475A | 14. 23.5    |
| 7. D475E |             |
| 8. K478A |             |

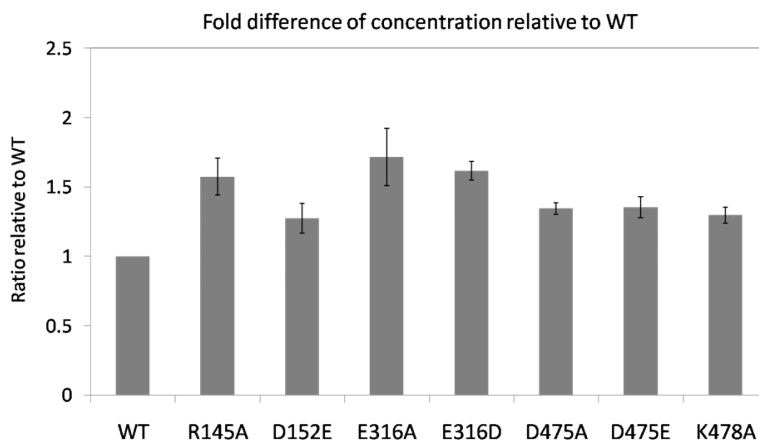

**S7:** Tables showing percent of wild-type rate for mutants at varied concentrations of polyprenyldiphosphate-disaccharide substrate. Left table contains numbers derived directly from measured rates. Right table contains numbers that have been corrected for concentration variation as measured by quantitative western blot.

% of WT rate, directly from measured rates

|       | 0.01 $\mu\text{M}$ | 0.1 $\mu\text{M}$ | 1 $\mu\text{M}$ |
|-------|--------------------|-------------------|-----------------|
| WT    | 100                | 100               | 100             |
| R145A | 0.15               | 0.24              | 0.37            |
| D152E | 4.2                | 7.4               | 9.7             |
| E316A | 0.3                | 0.8               | 1.0             |
| E316D | 4.6                | 18.2              | 27.0            |
| D475A | 18.1               | 28.3              | 44.5            |
| D475E | 33.5               | 34.4              | 48.4            |
| K478A | 45.4               | 40.5              | 36.4            |

% of WT rate, corrected for concentration differences

|       | 0.01 $\mu\text{M}$ | 0.1 $\mu\text{M}$ | 1.0 $\mu\text{M}$ |
|-------|--------------------|-------------------|-------------------|
| WT    | 100                | 100               | 100               |
| R145A | 0.13               | 0.15              | 0.23              |
| D152E | 3.2                | 5.8               | 7.6               |
| E316A | 0.2                | 0.4               | 0.6               |
| E316D | 3                  | 11                | 17                |
| D475A | 10                 | 21                | 33                |
| D475E | 17                 | 25                | 36                |
| K478A | 25                 | 31                | 28                |
